# Supplementary material for: Efficacy and Safety of Habitual Consumption of a Food Supplement Containing Miraculin in Malnourished Cancer Patients: the CLINMIR Pilot Study
Source: bioRxiv or medRxiv preprint supplement (doi:10.1101/2024.05.15.24307453), 2024-05-16
Supplement: Supplementary file [file media-1.pdf]

# Efficacy and Safety of Habitual Consumption of a Food Supplement Containing Miraculin in Malnourished Cancer Patients: the CLINMIR Pilot Study

Bricia López-Plaza<sup>1,2\*</sup>, Ana Isabel Álvarez-Mercado<sup>3,4,5</sup>, Lucía Arcos-Castellanos<sup>1</sup>, Julio Plaza-Díaz<sup>4,6,7</sup>, Francisco Javier Ruiz-Ojeda<sup>4,5,6,8</sup>, Marco Brandimonte-Hernández<sup>5,6</sup>, Jaime Feliú-Batlle<sup>9,10,11</sup>, Thomas Hummel<sup>12</sup>, Ángel Gil<sup>4,5,6,8,†</sup> and Samara Palma Milla<sup>1,11,13,†</sup>

<sup>1</sup> Food, Nutrition and Health Platform, Hospital La Paz Institute for Health Research (IdiPAZ), 28046 Madrid, Spain; [bricia.plaza@idipaz.es](mailto:bricia.plaza@idipaz.es); [lucia.arcos.castellanos@idipaz.es](mailto:lucia.arcos.castellanos@idipaz.es)

<sup>2</sup> Medicine Department, Faculty of Medicine, Complutense University of Madrid, Plaza de Ramón y Cajal, s/n, 28040 Madrid, Spain

<sup>3</sup> Department of Pharmacology, University of Granada, 18071 Granada, Spain; [alvarezmercado@ugr.es](mailto:alvarezmercado@ugr.es)

<sup>4</sup> Instituto de Investigación Biosanitaria ibs.GRANADA, Complejo Hospitalario Universitario de Granada, 18014 Granada, Spain

<sup>5</sup> Institute of Nutrition and Food Technology "José Mataix", Centre of Biomedical Research, University of Granada, Avda. del Conocimiento s/n, Armilla, 18016 Granada, Spain

<sup>6</sup> Department of Biochemistry and Molecular Biology II, University of Granada, 18071 Granada, Spain; [jrplaza@ugr.es](mailto:jrplaza@ugr.es); [agil@ugr.es](mailto:agil@ugr.es)

<sup>7</sup> Children's Hospital of Eastern Ontario Research Institute, Ottawa, ON K1H 8L1, Canada

<sup>8</sup> CIBEROBN (CIBER Physiopathology of Obesity and Nutrition), Instituto de Salud Carlos III, 28029 Madrid, Spain

<sup>9</sup> Oncology Department, Hospital La Paz Institute for Health Research—IdiPAZ, Hospital Universitario La Paz, 28029 Madrid, Spain; [jaime.feliu@salud.madrid.org](mailto:jaime.feliu@salud.madrid.org)

<sup>10</sup> CIBERONC (CIBER Cancer), Instituto de Salud Carlos III, 28029 Madrid, Spain

<sup>11</sup> Medicine Department, Faculty of Medicine, Autonomous University of Madrid, Arzobispo Morcillo 4, 28029 Madrid, Spain

<sup>12</sup> Smell & Taste Clinic, Department of Otorhinolaryngology, Technische Universität Dresden, Fetscherstraße 74, 01307 Dresden, Germany; [thomas.hummel@tu-dresden.de](mailto:thomas.hummel@tu-dresden.de)

<sup>13</sup> Nutrition Department, Hospital University La Paz, 28046 Madrid, Spain; [samara.palma@salud.madrid.org](mailto:samara.palma@salud.madrid.org)

\* Correspondence: [briciaplaza@idipaz.es](mailto:briciaplaza@idipaz.es); Tel.: +34 917277000 Ext 449507 (B.L.-P).

† These authors contributed equally to this work.

**Table S1.** Perception of food consumption depending on treatment

|              |         | Standard dose of DMB |          |          | High dose of DMB |          |          | Placebo |          |          | P-value |          |          |
|--------------|---------|----------------------|----------|----------|------------------|----------|----------|---------|----------|----------|---------|----------|----------|
|              |         | 1 month              | 2 months | 3 months | 1 month          | 2 months | 3 months | 1 month | 2 months | 3 months | 1 month | 2 months | 3 months |
| Eat the same | Yes (%) | 66.7                 | 85.7     | 50       | 85.7             | 50       | 25       | 50      | 50       | 50       | 0.348   | 0.298    | 0.683    |
|              | No (%)  | 33.3                 | 14.3     | 50       | 14.3             | 50       | 75       | 50      | 50       | 50       |         |          |          |
| Eat less     | Yes (%) | 22.2                 | 0        | 0        | 0                | 33.3     | 50       | 0       | 0        | 0        | 0.204   | 0.089    | 0.032    |
|              | No (%)  | 77.8                 | 100      | 100,00   | 100              | 66.7     | 50       | 100     | 100      | 100      |         |          |          |
| Eat more     | Yes (%) | 11.1                 | 14.3     | 50,00    | 14.3             | 16.7     | 25       | 50      | 50       | 50       | 0.172   | 0.280    | 0.683    |
|              | No (%)  | 88.9                 | 85.7     | 50,00    | 85.7             | 83.3     | 75       | 50      | 50       | 50       |         |          |          |

**Table S2.** Nutritional status depending on treatment (%)

|                            |          | Standard dose of DMB |          | High dose of DMB |          | Placebo  |          | p-value  |          |
|----------------------------|----------|----------------------|----------|------------------|----------|----------|----------|----------|----------|
|                            |          | Baseline             | 3 months | Baseline         | 3 months | Baseline | 3 months | Baseline | 3 months |
| Weight lost percentage     | No       | 0                    | 87.5     | 0                | 83.3     | 0        | 100      | 0.772    | 0.556    |
|                            | 5 – 10   | 70                   | 12.5     | 81.8             | 16.7     | 70       | 0        |          |          |
|                            | >10      | 30                   | 0        | 18.2             | 0        | 30       | 0        |          |          |
| GLIM Criteria Malnutrition | Normal   | 0                    | 62.5     | 0                | 83.3     | 0        | 71.4     | 0.556    | 0.407    |
|                            | Moderate | 50                   | 12.5     | 81.8             | 16.7     | 70       | 28.6     |          |          |
|                            | Severe   | 50                   | 25       | 18.2             | 0        | 30       | 0        |          |          |

**Table S3.** Perceived effectiveness of the product depending on treatment (mean  $\pm$  SD)

|                         | Points | Standard dose of DMB |                 |                 |                 | High dose of DMB |                 |                 |                 | Placebo         |                 |                 |                 | P-value  |               |       |
|-------------------------|--------|----------------------|-----------------|-----------------|-----------------|------------------|-----------------|-----------------|-----------------|-----------------|-----------------|-----------------|-----------------|----------|---------------|-------|
|                         |        | Baseline             | 1 week          | 2 months        | 3 months        | Baseline         | 1 week          | 2 meses         | 3 meses         | Baseline        | 1 week          | 2 meses         | 3 meses         | Time (t) | Treatment (T) | T x t |
| Perceived effectiveness |        | 33.0 $\pm$ 27.5      | 33.0 $\pm$ 27.5 | 62.5 $\pm$ 23.8 | 63.8 $\pm$ 21.3 | 46.5 $\pm$ 25.5  | 44.5 $\pm$ 27.2 | 71.7 $\pm$ 24.2 | 58.3 $\pm$ 37.2 | 66.4 $\pm$ 42.9 | 59.3 $\pm$ 40.5 | 75.0 $\pm$ 38.9 | 75.0 $\pm$ 38.9 | 0.052    | 0.074         | 0.628 |

41  
42  
43  
44  
45  
46  
47  
48  
49  
50  
51  
52  
53  
54  
55

**Table S4.** Adverse events depending on the assigned treatment group (%)

|                      |         | Standard dose of DMB |          |          | High dose of DMB |          |          | Placebo |          |          | P-value |          |          |
|----------------------|---------|----------------------|----------|----------|------------------|----------|----------|---------|----------|----------|---------|----------|----------|
|                      |         | 1 month              | 2 months | 3 months | 1 month          | 2 months | 3 months | 1 month | 2 months | 3 months | 1 month | 2 months | 3 months |
| Abdominal distension | Grade 0 | 90                   | 87.5     | 100      | 85.7             | 66.7     | 60       | 100     | 83.3     | 83.3     | 0.649   | 0.629    | 0.157    |
|                      | Grade 1 | 10                   | 12.5     | 0        | 14.3             | 16.7     | 40       | 0       | 16.7     | 16.7     |         |          |          |
|                      | Grade 2 | 0                    | 0        | 0        | 0                | 16.7     | 0        | 0       | 0        | 0        |         |          |          |
| Abdominal pain       | Grade 0 | 90                   | 100      | 87.5     | 85.7             | 100      | 60       | 83.3    | 100      | 83.3     | 0.578   | 1        | 0.520    |
|                      | Grade 1 | 10                   | 0        | 12.5     | 14.3             | 0        | 20       | 16.7    | 0        | 16.7     |         |          |          |
|                      | Grade 2 | 0                    | 0        | 0        | 0                | 0        | 20       | 0       | 0        | 0        |         |          |          |
| Nausea               | Grade 0 | 90                   | 100      | 87.5     | 85.7             | 83.3     | 80       | 100     | 100      | 100      | 0.454   | 0.293    | 0.545    |
|                      | Grade 1 | 10                   | 0        | 12.5     | 14.3             | 16.7     | 20       | 0       | 0        | 0        |         |          |          |
|                      | Grade 2 | 0                    | 0        | 0        | 0                | 0        | 0        | 0       | 0        | 0        |         |          |          |
| Regurgitation        | Grade 0 | 90                   | 100      | 75       | 85.7             | 100      | 60       | 100     | 83.3     | 100      | 0.454   | 0.293    | 0.307    |
|                      | Grade 1 | 10                   | 0        | 25       | 14.3             | 0        | 20       | 0       | 16.7     | 0        |         |          |          |
|                      | Grade 2 | 0                    | 0        | 0        | 0                | 0        | 20       | 0       | 0        | 0        |         |          |          |
| Vomiting             | Grade 0 | 100                  | 100      | 100      | 85.7             | 83.3     | 80       | 83.3    | 100      | 100      | 0.426   | 0.293    | 0.228    |
|                      | Grade 1 | 0                    | 0        | 0        | 14.3             | 16.7     | 20       | 16.7    | 0        | 0        |         |          |          |
|                      | Grade 2 | 0                    | 0        | 0        | 0                | 0        | 0        | 0       | 0        | 0        |         |          |          |
| Constipation         | Grade 0 | 90                   | 100      | 87.5     | 83.3             | 66.7     | 40       | 100     | 100      | 66.7     | 0.598   | 0.075    | 0.301    |
|                      | Grade 1 | 10                   | 0        | 12.5     | 16.7             | 33.3     | 40       | 0       | 0        | 33.3     |         |          |          |
|                      | Grade 2 | 0                    | 0        | 0        | 0                | 0        | 20       | 0       | 0        | 0        |         |          |          |
| Diarrhea             | Grade 0 | 100                  | 100      | 100      | 57.1             | 100      | 60       | 100     | 100      | 83.3     | 0.019   | 1        | 0.157    |
|                      | Grade 1 | 0                    | 0        | 0        | 42.9             | 0        | 40       | 0       | 0        | 16.7     |         |          |          |
|                      | Grade 2 | 0                    | 0        | 0        | 0                | 0        | 0        | 0       | 0        | 0        |         |          |          |
| Flatulence           | Grade 0 | 70                   | 87.5     | 75       | 85.7             | 50       | 40       | 100     | 100      | 83.3     | 0.158   | 0.227    | 0.378    |
|                      | Grade 1 | 30                   | 12.5     | 25       | 14.3             | 33.3     | 40       | 0       | 0        | 16.7     |         |          |          |
|                      | Grade 2 | 0                    | 0        | 0        | 0                | 16.7     | 20       | 0       | 0        | 0        |         |          |          |
| Intensity            | Grade 0 | 28.6                 | 100      | 50       | 40               | 33.3     | 50       | 57.1    | 83.3     | 100      | 0.346   | 0.096    | 0.247    |
|                      | Grade 1 | 14.3                 | 0        | 50       | 20               | 0        | 50       | 42.9    | 16.7     | 0        |         |          |          |
|                      | Grade 2 | 57.1                 | 0        | 0        | 40               | 66.7     | 0        | 0       | 0        | 0        |         |          |          |
| Product relationship | Grade 0 | 33.3                 | 100      | 100      | 100              | 100      | 100      | 85.7    | 100      | 100      | 0.118   | 1        | 1        |
|                      | Grade 1 | 50                   | 0        | 0        | 0                | 0        | 0        | 14.3    | 0        | 0        |         |          |          |
|                      | Grade 2 | 16.7                 | 0        | 0        | 0                | 0        | 0        | 0       | 0        | 0        |         |          |          |
| Conduct adopted      | Grade 0 | 33.3                 | 0        | 0        | 50               | 0        | 0        | 33.3    | 0        | 0        | 0.833   | 0.135    | 1        |
|                      | Grade 1 | 50                   | 100      | 100      | 50               | 0        | 100      | 66.7    | 100      | 100      |         |          |          |
|                      | Grade 2 | 16.7                 | 0        | 0        | 0                | 100      | 0        | 0       | 0        | 0        |         |          |          |

Grade 0, not described; Grade 1, mild; Grade 2, moderate.
